# Supplementary material for: Highly tunable metal-free ring opening polymerization of glycidol into various controlled topologies catalyzed by frustrated lewis pairs
Source: Royal Society of Chemistry journal article supplement (doi:10.1039/d1py01442k), 2022-01-01
Supplement: d1py01442k1.pdf [file d1py01442k1.pdf]

# Highly Tunable Metal-Free Ring Opening Polymerization of Glycidol into Various Controlled Topologies Catalyzed by Frustrated Lewis Pairs

*Si Eun Kim,<sup>a,b</sup> Yu-Ri Lee,<sup>c</sup> Minseong Kim,<sup>d,e</sup> Eunyong Seo,<sup>f</sup> Hyun-Jong Paik,<sup>b</sup> Jin Chul Kim,<sup>a</sup> Ji-  
Eun Jeong,<sup>a</sup> Young Il Park,<sup>a\*</sup> Byeong-Su Kim,<sup>d\*</sup> and Sang-Ho Lee<sup>a\*</sup>*

<sup>a</sup>Center for Advanced Specialty Chemicals, Korea Research Institute of Chemical Technology  
(KRICT), Ulsan 44412, Republic of Korea

<sup>b</sup>Department of Polymer Science and Engineering, Pusan National University, Busan 46241,  
Republic of Korea

<sup>c</sup>Materials Architecturing Research Center, Korea Institute of Science and Technology (KIST),  
Seoul 02792, Republic of Korea

<sup>d</sup>Department of Chemistry, Yonsei University, Seoul 03722, Republic of Korea

<sup>e</sup>Department of Chemistry, Ulsan National Institute of Science and Technology (UNIST), Ulsan  
44919, Republic of Korea

<sup>f</sup>Department of Chemical Engineering, Ulsan College, Ulsan 44610, Republic of Korea

Correspondence and requests for materials should be addressed to

S.-H.L. (e-mail: [slee@kRICT.re.kr](mailto:slee@kRICT.re.kr)), B.-S.K. (e-mail: [bskim19@yonsei.ac.kr](mailto:bskim19@yonsei.ac.kr)), Y.I.P. (e-mail:  
[ypark@kRICT.re.kr](mailto:ypark@kRICT.re.kr))

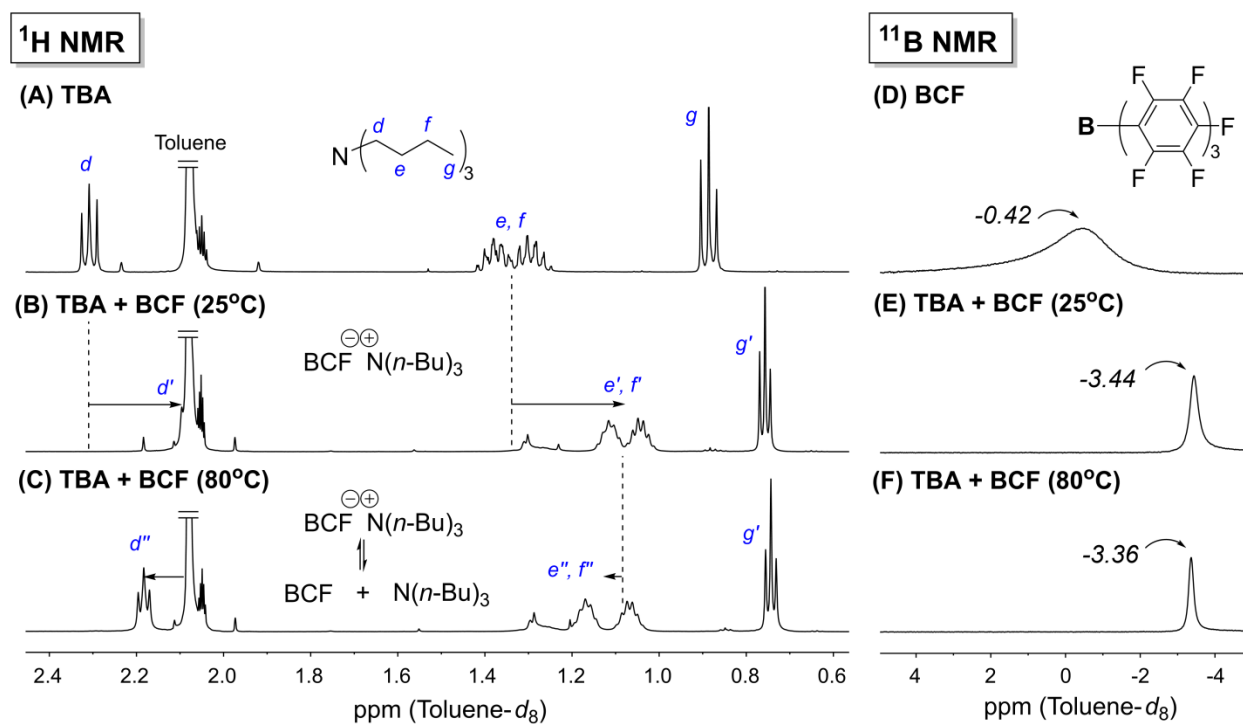

**Figure S1.** <sup>1</sup>H NMR spectra of (A) TBA ([TBA]<sub>0</sub> = 40 mM in toluene) at 25 °C, (B) a mixture prepared with a 2:1 ratio ([TBA]<sub>0</sub> = 40 mM; [BCF]<sub>0</sub> = 20 mM) at 25 °C, and (C) a mixture prepared with a 2:1 ratio ([TBA]<sub>0</sub> = 40 mM; [BCF]<sub>0</sub> = 20 mM) at 80 °C; <sup>11</sup>B NMR spectra of (D) BCF ([BCF]<sub>0</sub> = 20 mM) at 25 °C, (E) a mixture prepared with a 2:1 ratio ([TBA]<sub>0</sub> = 40 mM; [BCF]<sub>0</sub> = 20 mM) at 25 °C, and (F) a mixture prepared with a 2:1 ratio ([TBA]<sub>0</sub> = 40 mM; [BCF]<sub>0</sub> = 20 mM) at 80 °C.

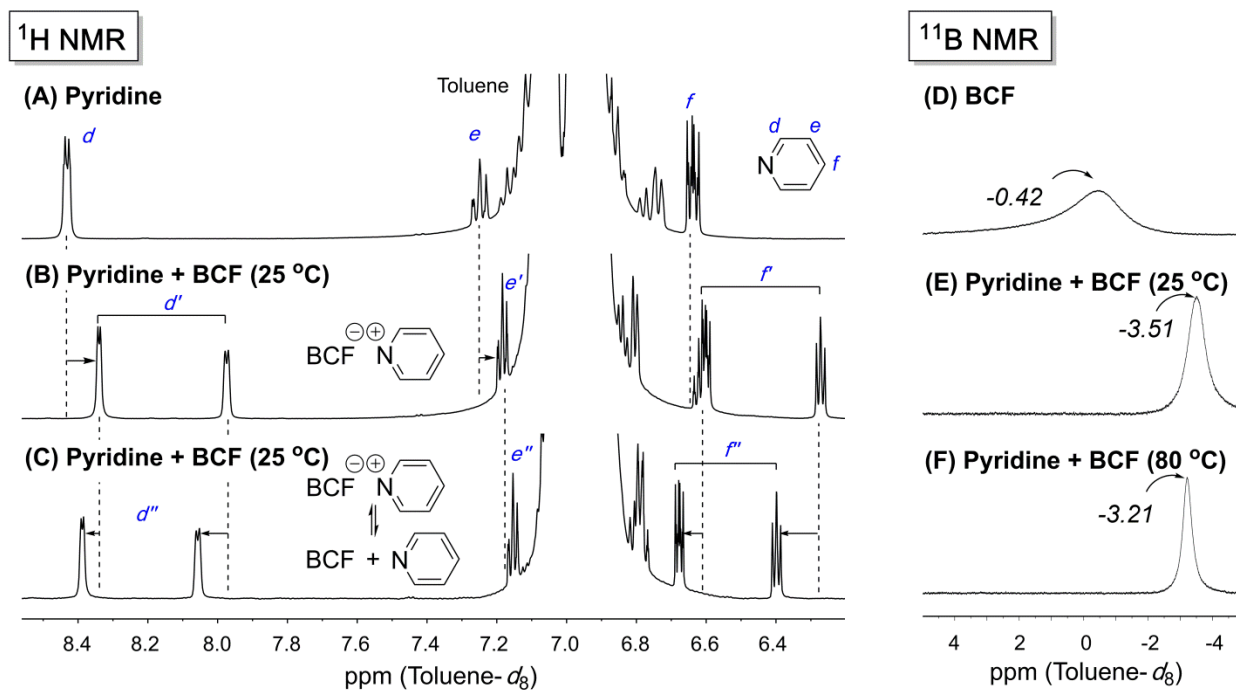

**Figure S2.** <sup>1</sup>H NMR spectra of (A) Py ([Py]<sub>0</sub> = 40 mM in toluene) at 25 °C, (B) a mixture of Py and BCF with a 2:1 ratio ([Py]<sub>0</sub> = 40 mM; [BCF]<sub>0</sub> = 20 mM) at 25 °C, (C) a mixture of Py and BCF with a 2:1 ratio ([Py]<sub>0</sub> = 40 mM; [BCF]<sub>0</sub> = 20 mM) at 80 °C, <sup>11</sup>B NMR spectra of (D) BCF ([BCF]<sub>0</sub> = 20 mM) at 25 °C, (E) a mixture of Py and BCF with a 2:1 ratio ([Py]<sub>0</sub> = 40 mM; [BCF]<sub>0</sub> = 20 mM) at 25 °C, and (F) a mixture of Py and BCF with a 2:1 ratio ([Py]<sub>0</sub> = 40 mM; [BCF]<sub>0</sub> = 20 mM) at 80 °C.

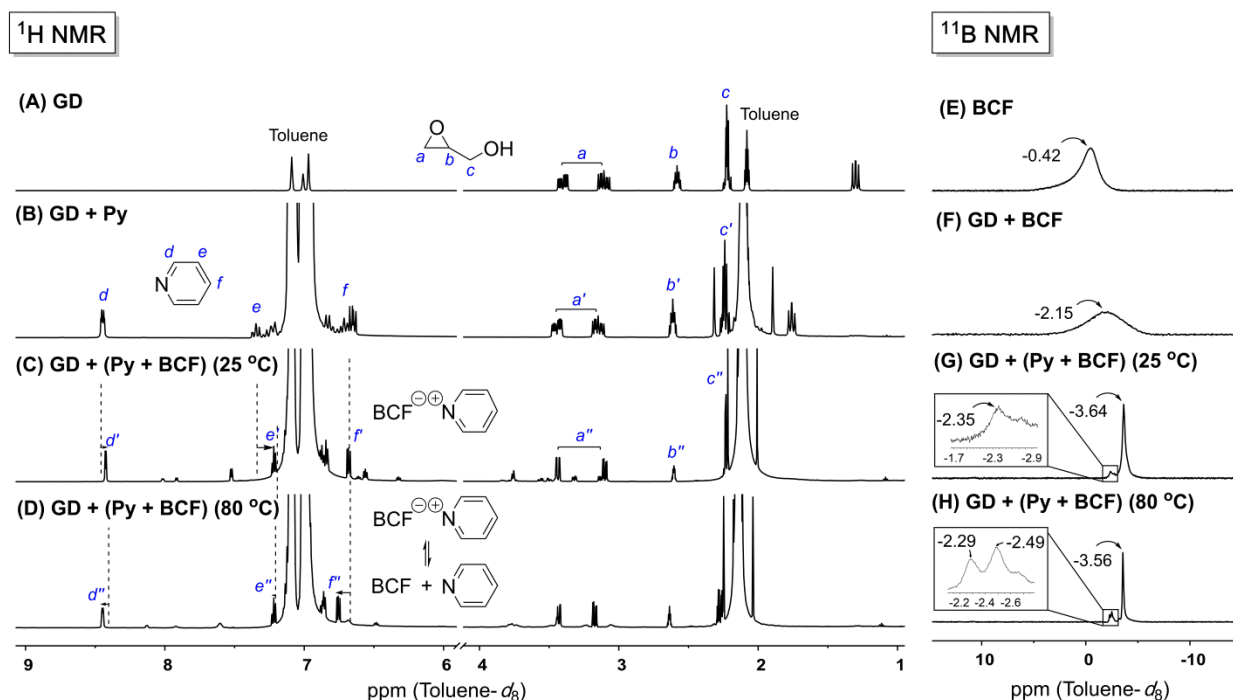

**Figure S3.** <sup>1</sup>H NMR spectra of (A) ([GD]<sub>0</sub> = 40 mM in toluene) at 25 °C, (B) a mixture of GD and Py with a 1:1 ratio ([GD]<sub>0</sub> = 40 mM; [Py]<sub>0</sub> = 40 mM) at 25 °C, (C) a mixture of GD and BCF-Py ([GD]<sub>0</sub> = 40 mM; [Py]<sub>0</sub> = 40 mM; [BCF]<sub>0</sub> = 20 mM) at 25 °C, (D) a mixture of GD and BCF-Py ([GD]<sub>0</sub> = 40 mM; [Py]<sub>0</sub> = 40 mM; [BCF]<sub>0</sub> = 20 mM) at 80 °C; <sup>11</sup>B NMR spectra of (E) BCF ([BCF]<sub>0</sub> = 20 mM) at 25 °C, (F) a mixture of Py and BCF with a 2:1 ratio ([Py]<sub>0</sub> = 40 mM; [BCF]<sub>0</sub> = 20 mM) at 25 °C, (G) a mixture of GD and BCF-Py ([GD]<sub>0</sub> = 40 mM; [Py]<sub>0</sub> = 40 mM; [BCF]<sub>0</sub> = 20 mM) at 25 °C, and (H) a mixture of GD and BCF-Py ([GD]<sub>0</sub> = 40 mM; [Py]<sub>0</sub> = 40 mM; [BCF]<sub>0</sub> = 20 mM) at 80 °C.

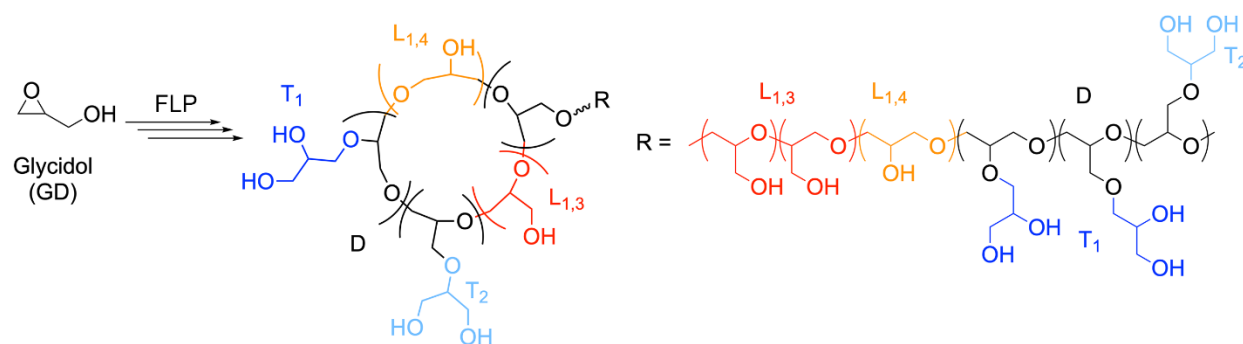

(A) TBA-P15

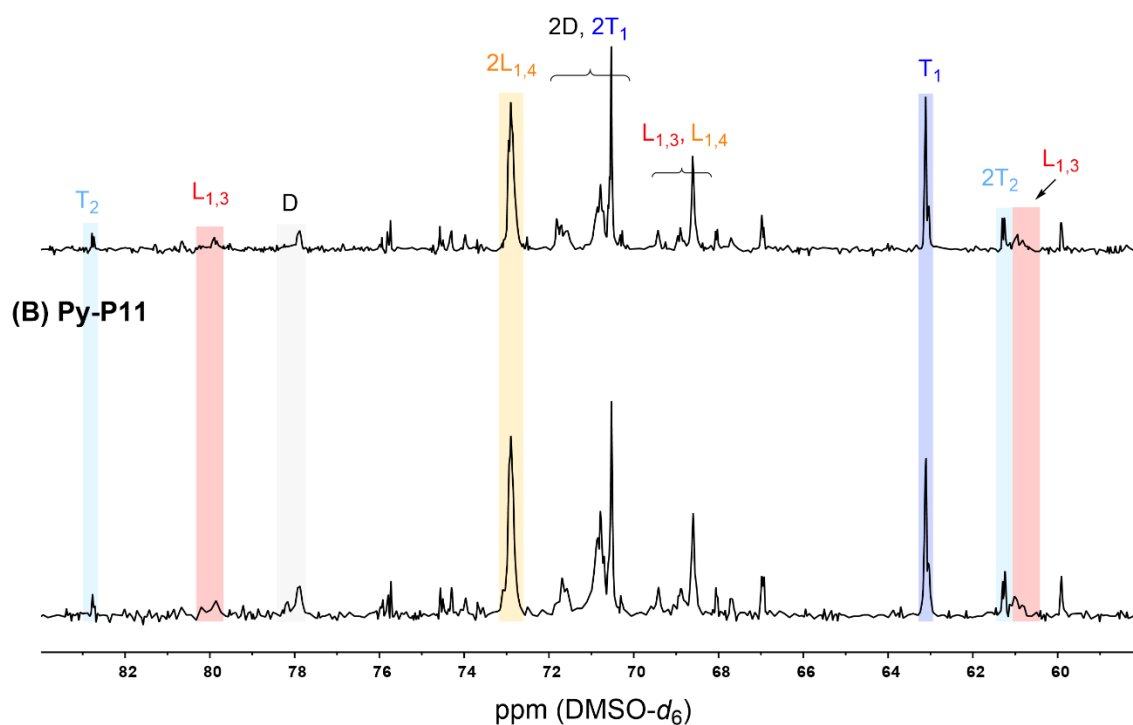

**Figure S4.** Inverse-gated <sup>13</sup>C NMR spectra (DMSO-*d*<sub>6</sub>, room temperature) of (A) TBA-P15 ([GD]<sub>0</sub> = 2500 mM; [B(C<sub>6</sub>F<sub>5</sub>)<sub>3</sub>]<sub>0</sub> = 3 mM; [TBA]<sub>0</sub> = 12 mM in toluene), and (B) Py-P11 ([GD]<sub>0</sub> = 2500 mM; [B(C<sub>6</sub>F<sub>5</sub>)<sub>3</sub>]<sub>0</sub> = 3 mM; [Py]<sub>0</sub> = 6 mM in toluene).

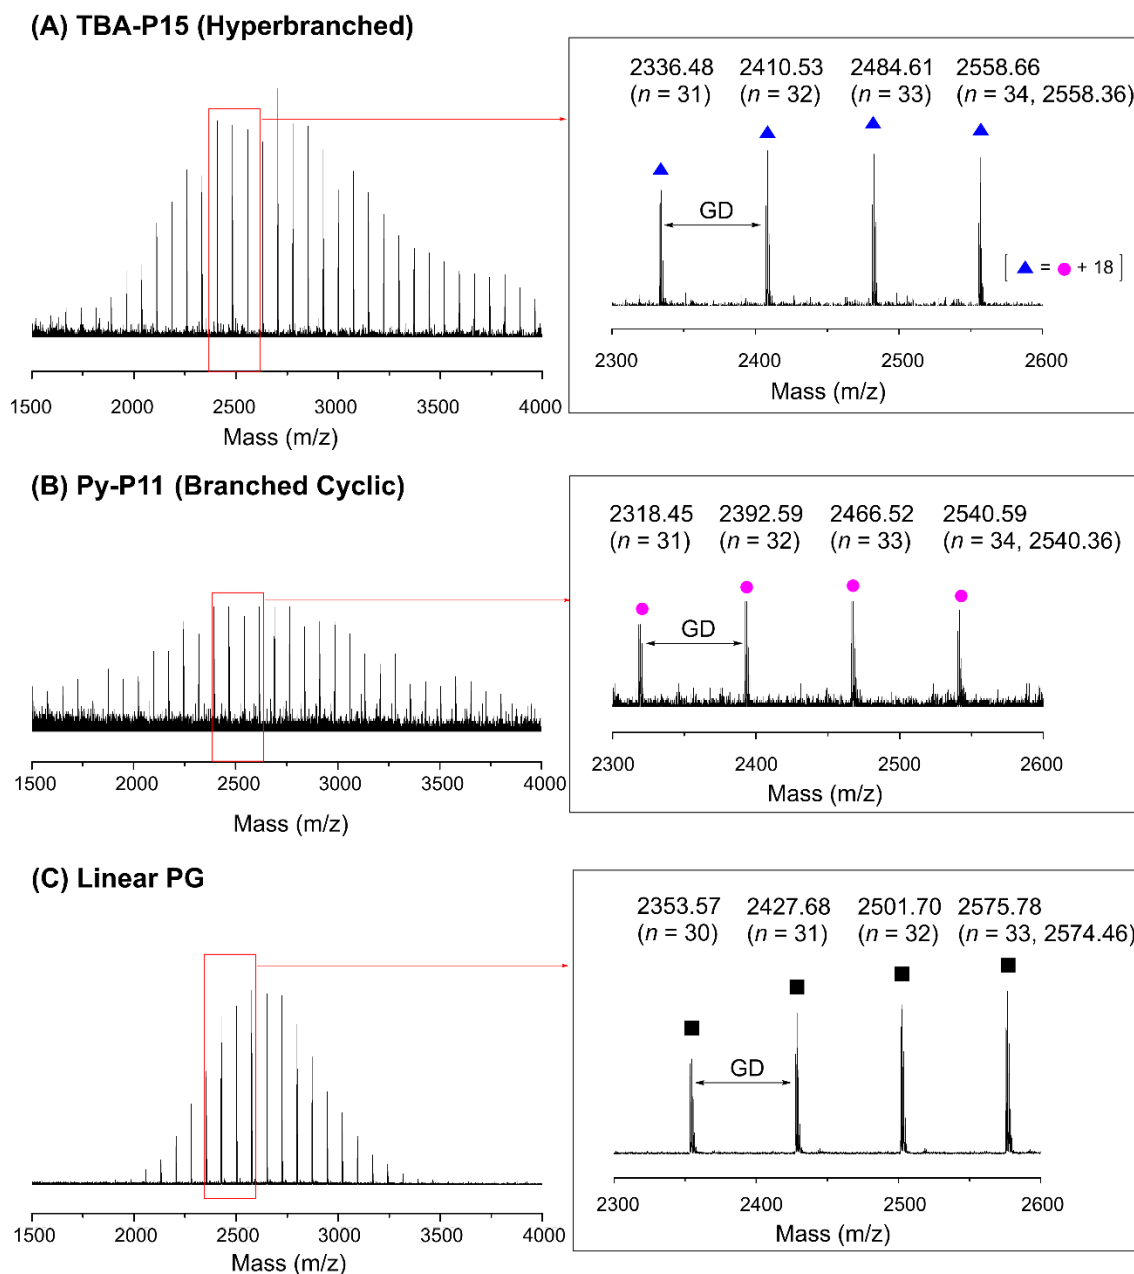

**Figure S5.** Representative MALDI-ToF spectra for (A) TBA-P15 (*hb*-PG), (B) Py-P11 (*bc*-PG) and (C) linear PG (*lin*-PG) from 1500 to 4500 Da.

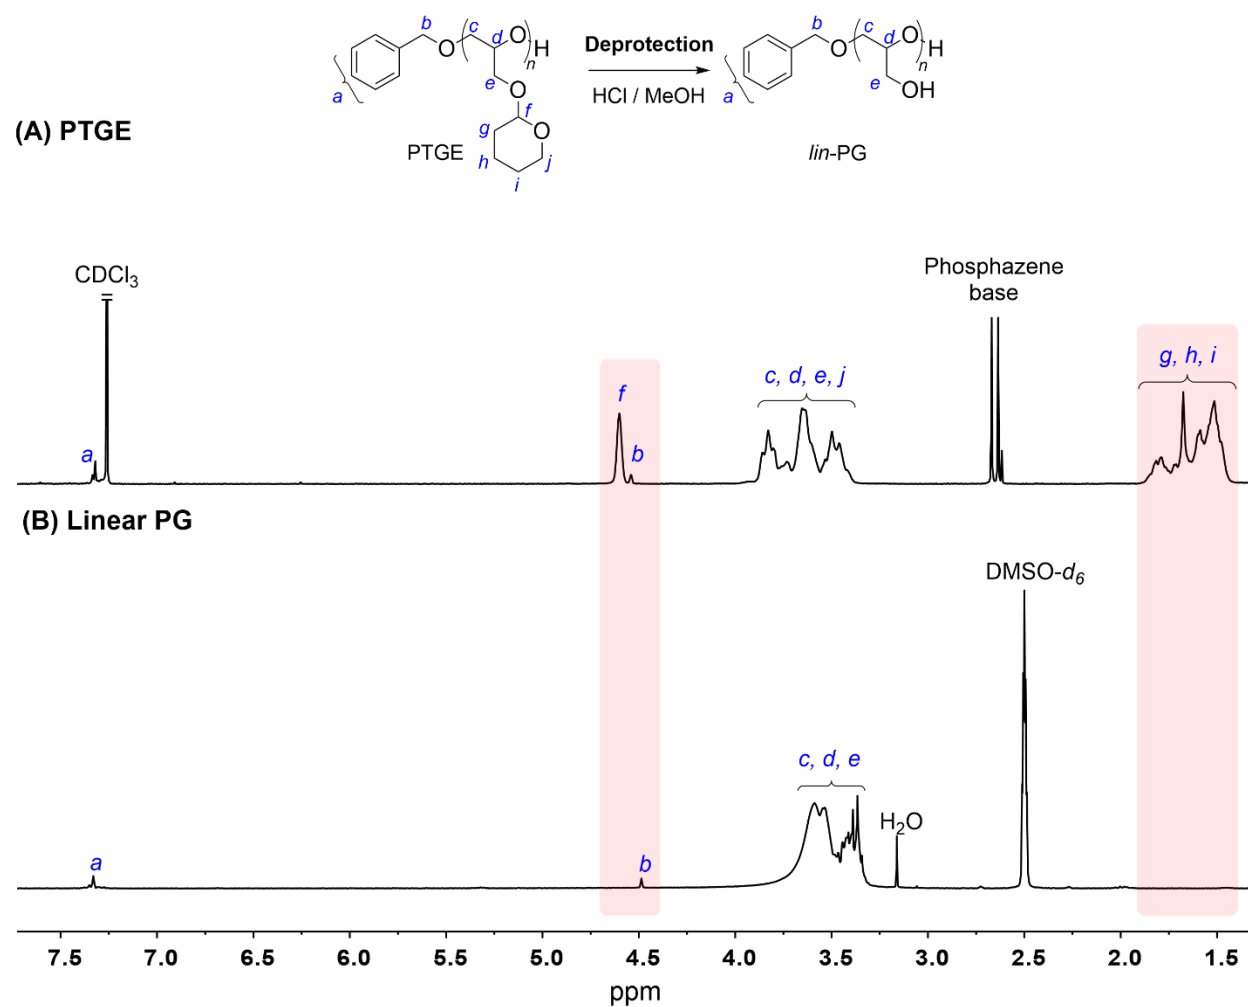

**Figure S6.** <sup>1</sup>H NMR spectra of (A) poly(TGE) ([benzyl alcohol]<sub>0</sub> = 65 mM; [*t*-BuP<sub>4</sub>]<sub>0</sub> = 84.5 mM; [TGE]<sub>0</sub> = 2340 mM in toluene at 25 °C for 24 h) and (B) *lin*-PG (a solution of poly(TGE) (0.5 g  $M_{n, NMR} = 5650$ ) in HCl/MeOH (1.25 M, 0.13 mL) at room temperature for 24 h).

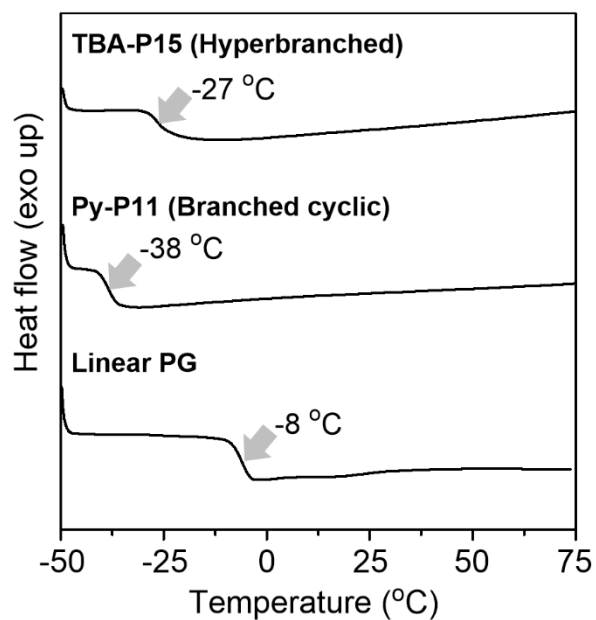

**Figure S7.** DSC profiles (heating, 10 °C/min) of topology-controlled PGs (TBA-P15 (hyperbranched), Py-P11 (branched cyclic), and linear PG).



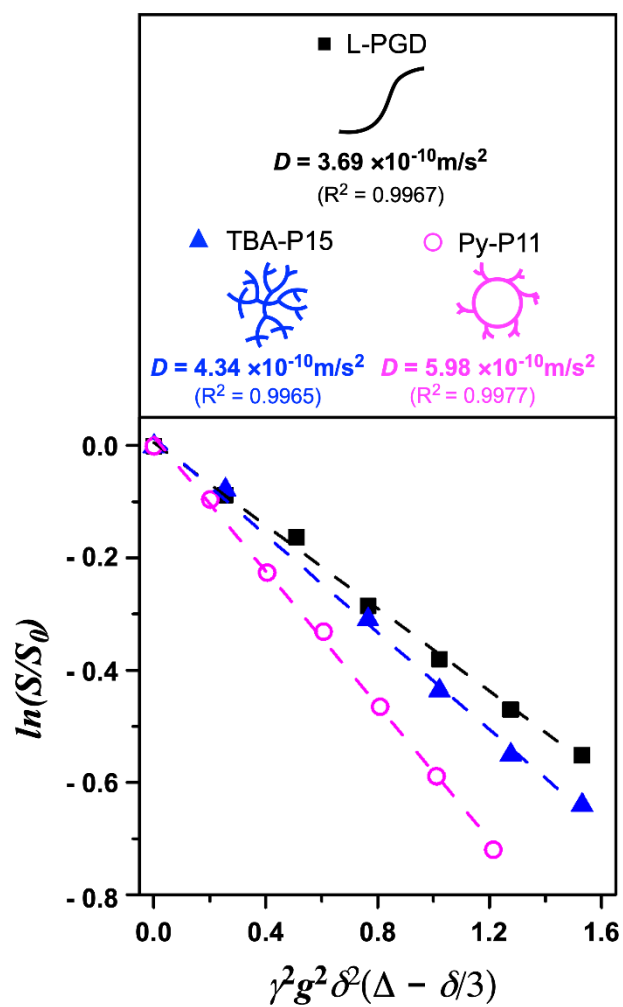

**Figure S8.** Stejskal–Tanner plot obtained from  $^1\text{H}$  DOSY spectra and the determined diffusion coefficient ( $D$ ) values.

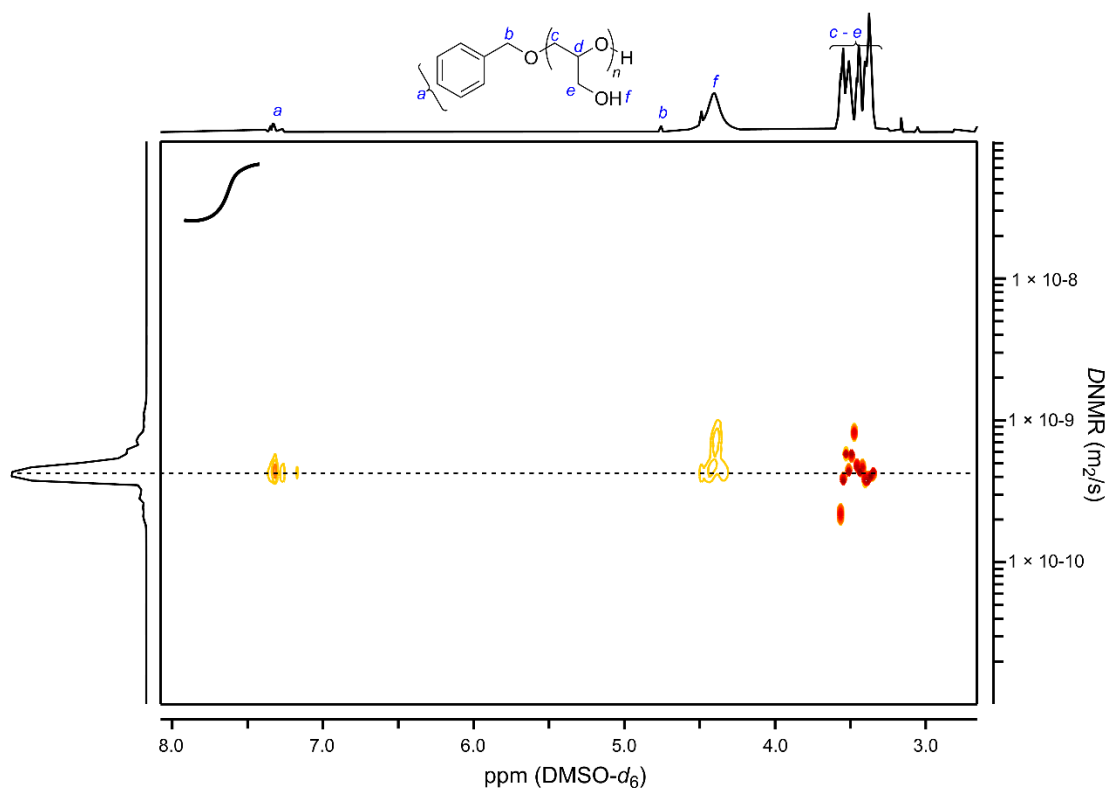

**Figure S9.**  $^1\text{H}$  DOSY spectra ( $\text{DMSO-}d_6$ , room temperature) of *lin*-PG.

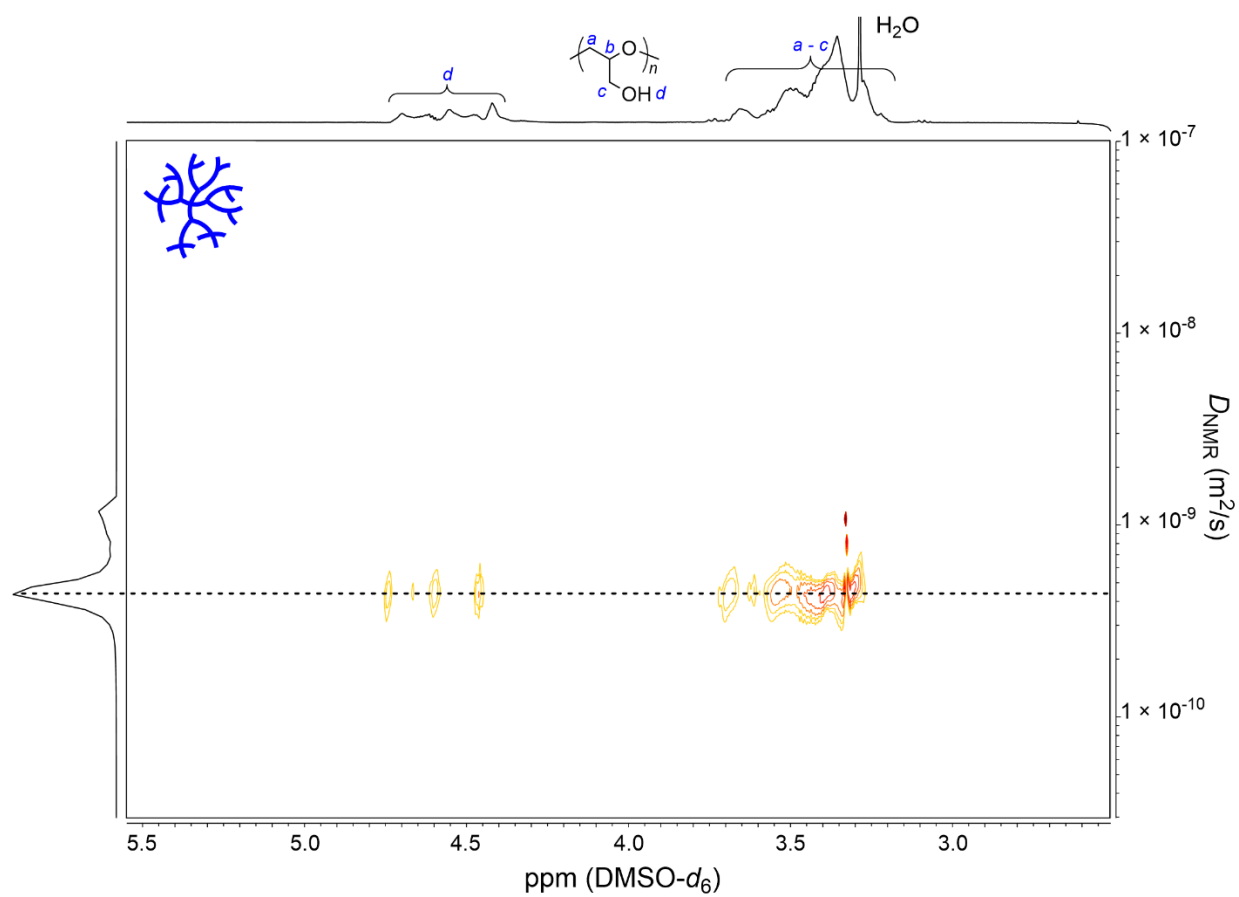

**Figure S10.**  $^1\text{H}$  DOSY spectra ( $\text{DMSO-}d_6$ , room temperature) of TBA-P15 (hyperbranched).

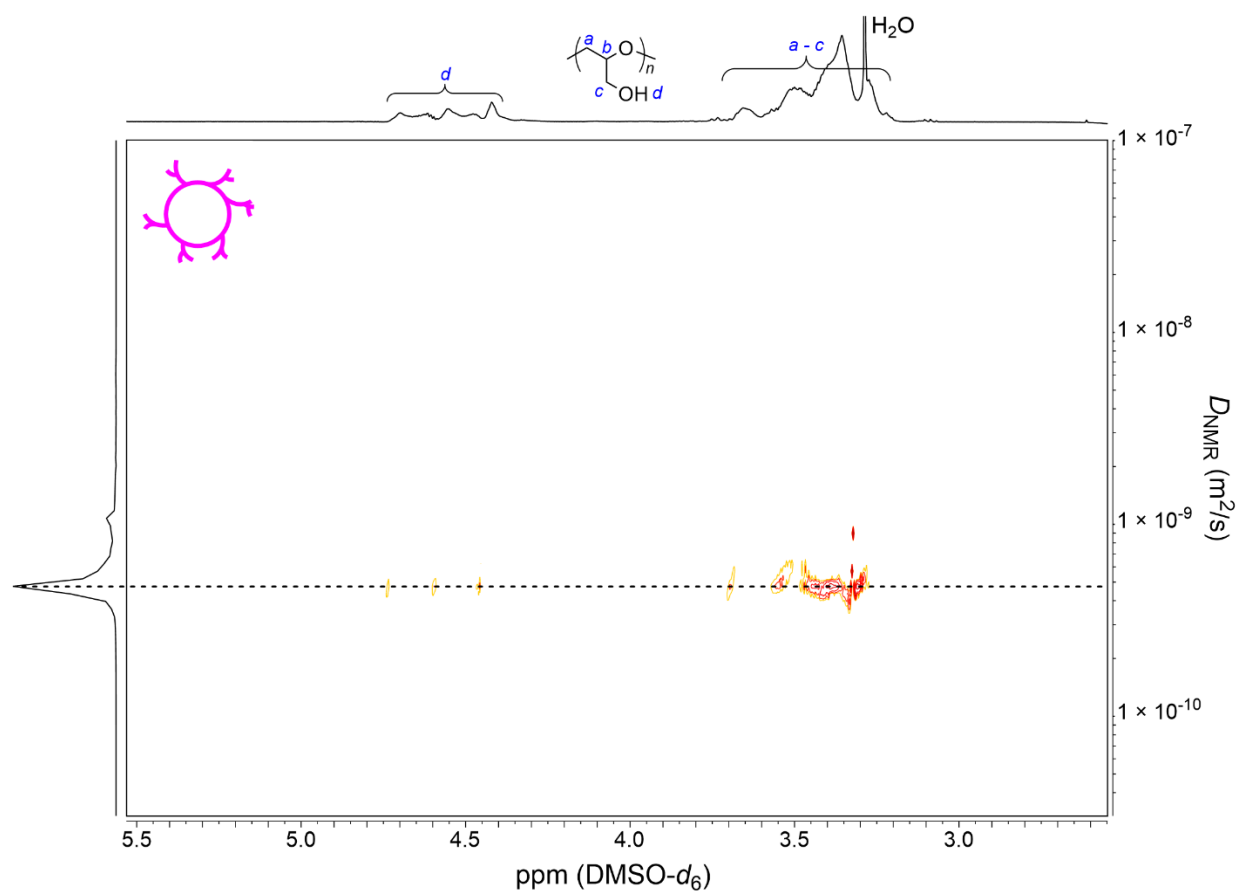

**Figure S11.**  $^1\text{H}$  DOSY spectra ( $\text{DMSO-}d_6$ , room temperature) of Py-P11 (branched cyclic).

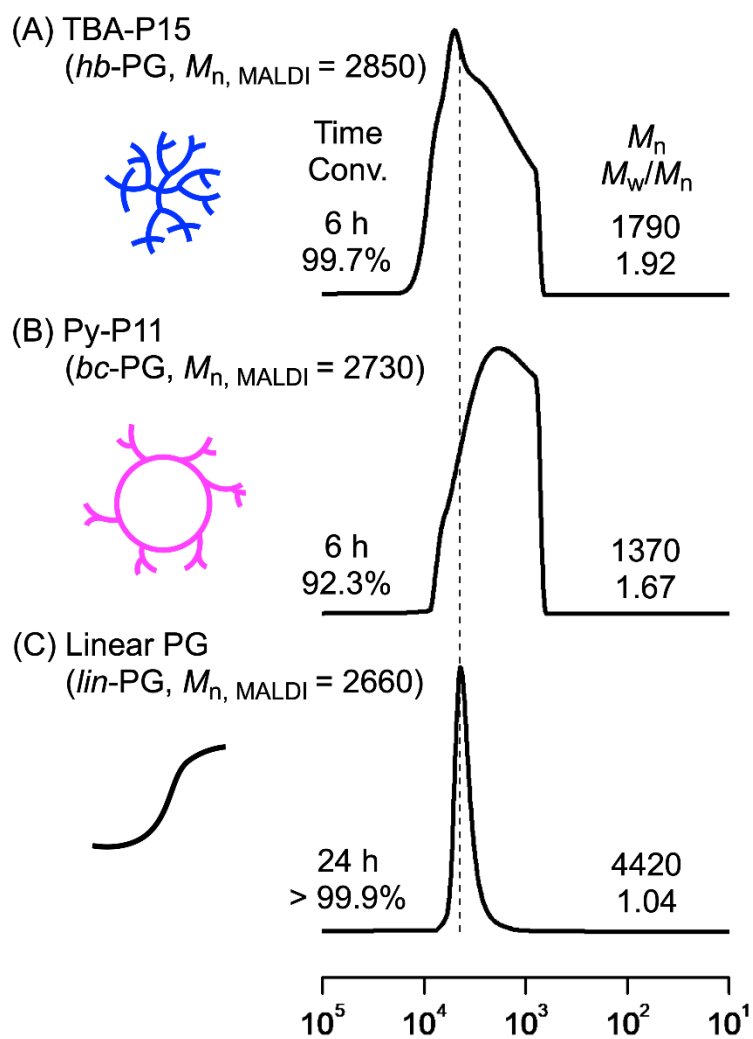

**Figure S12.** SEC curves of (A) TBA-P15 (*hb*-PG), (B) Py-P11 (*bc*-PG) and (C) linear PG (*lin*-PG).

**Table S1.** Structural control of PGs via BCF catalyst with  $(n\text{-Bu})_3\text{N}$  as Lewis base <sup>a</sup>

| Polymer code | $[\text{B}(\text{C}_6\text{F}_5)_3]_0$ (mM) | $[(n\text{-Bu})_3\text{N}]_0$ (mM) | Temp. (°C) | Time   | Conv. (%) <sup>b</sup> | $M_n^c$                 | $M_w/M_n^c$             | DB <sup>d</sup>         |
|--------------|---------------------------------------------|------------------------------------|------------|--------|------------------------|-------------------------|-------------------------|-------------------------|
| BCF-P1       | 3                                           | 0                                  | 25         | 15 min | 94.7                   | 2720                    | 1.55                    | 0.38                    |
| TBA-P2       | 0                                           | 12                                 | 25         | 72 h   | 55.0                   | <i>n/d</i> <sup>e</sup> | <i>n/d</i> <sup>e</sup> | <i>n/d</i> <sup>e</sup> |
| TBA-P3       | 0                                           | 12                                 | 100        | 6 h    | 99.7                   | 1620                    | 1.53                    | 0.67                    |
| TBA-P4       | 3                                           | 3                                  | 0          | 24 h   | < 5                    | <i>n/d</i> <sup>e</sup> | <i>n/d</i> <sup>e</sup> | <i>n/d</i> <sup>e</sup> |
| TBA-P5       | 3                                           | 3                                  | 25         | 24 h   | < 5                    | <i>n/d</i> <sup>e</sup> | <i>n/d</i> <sup>e</sup> | <i>n/d</i> <sup>e</sup> |
| TBA-P6       | 3                                           | 3                                  | 80         | 24 h   | 99.8                   | 1950                    | 1.65                    | 0.51                    |
| TBA-P7       | 3                                           | 3                                  | 100        | 24 h   | 99.8                   | 1830                    | 1.48                    | 0.49                    |
| TBA-P8       | 3                                           | 6                                  | 0          | 24 h   | < 5                    | <i>n/d</i> <sup>e</sup> | <i>n/d</i> <sup>e</sup> | <i>n/d</i> <sup>e</sup> |
| TBA-P9       | 3                                           | 6                                  | 25         | 72 h   | 44.7                   | <i>n/d</i> <sup>e</sup> | <i>n/d</i> <sup>e</sup> | <i>n/d</i> <sup>e</sup> |
| TBA-P10      | 3                                           | 6                                  | 80         | 6 h    | 93.3                   | 1600                    | 1.87                    | 0.50                    |
| TBA-P11      | 3                                           | 6                                  | 100        | 3 h    | 96.4                   | 1420                    | 1.74                    | 0.50                    |
| TBA-P12      | 3                                           | 12                                 | 0          | 72 h   | 49.6                   | <i>n/d</i> <sup>e</sup> | <i>n/d</i> <sup>e</sup> | <i>n/d</i> <sup>e</sup> |
| TBA-P13      | 3                                           | 12                                 | 25         | 72 h   | 97.4                   | 1500                    | 1.60                    | 0.46                    |
| TBA-P14      | 3                                           | 12                                 | 80         | 6 h    | 99.8                   | 1640                    | 1.73                    | 0.49                    |
| TBA-P15      | 3                                           | 12                                 | 100        | 6 h    | 99.7                   | 1790                    | 1.92                    | 0.51                    |

<sup>a</sup> $[\text{GD}]_0 = 2500$  mM in toluene. <sup>b</sup>Conversion was determined by <sup>1</sup>H NMR with tetralin as an internal standard. <sup>c</sup>Measured by size-exclusion chromatography calibrated with PEO standards in DMF (50 mM LiBr, 45 °C, flow rate 1.0 mL/min). <sup>d</sup>Degree of branching (DB) was calculated by inverse-gated <sup>13</sup>C NMR using the following equation:  $(D + T)/(D + T + L)$  ( $D$  = dendritic unit;  $T$  = terminal unit;  $L$  = linear unit). <sup>e</sup>Not determined.

**Table S2.** Structural control of PGs using BCF catalyst with pyridine as Lewis base<sup>a</sup>

| Polymer code | [B(C <sub>6</sub> F <sub>5</sub> ) <sub>3</sub> ] <sub>0</sub> (mM) | [Pyridine] <sub>0</sub> (mM) | Temp. (°C) | Time   | Conv. (%) <sup>b</sup> | <i>M<sub>n</sub></i> <sup>c</sup> | <i>M<sub>w</sub></i> / <i>M<sub>n</sub></i> <sup>c</sup> | DB <sup>d</sup>         |
|--------------|---------------------------------------------------------------------|------------------------------|------------|--------|------------------------|-----------------------------------|----------------------------------------------------------|-------------------------|
| BCF-P1       | 3                                                                   | 0                            | 25         | 15 min | 94.7                   | 2720                              | 1.55                                                     | 0.38                    |
| Py-P2        | 0                                                                   | 6.0                          | 0          | 24 h   | <1.0                   | <i>n/d</i> <sup>e</sup>           | <i>n/d</i> <sup>e</sup>                                  | <i>n/d</i> <sup>e</sup> |
| Py-P3        | 0                                                                   | 6.0                          | 100        | 24 h   | 99.5                   | 1670                              | 1.50                                                     | 0.50                    |
| Py-P4        | 3                                                                   | 3.0                          | 0          | 12 d   | 49.03                  | <i>n/d</i> <sup>e</sup>           | <i>n/d</i> <sup>e</sup>                                  | <i>n/d</i> <sup>e</sup> |
| Py-P5        | 3                                                                   | 3.0                          | 25         | 12 d   | 50.41                  | <i>n/d</i> <sup>e</sup>           | <i>n/d</i> <sup>e</sup>                                  | <i>n/d</i> <sup>e</sup> |
| Py-P6        | 3                                                                   | 3.0                          | 80         | 12 d   | >99.9                  | 3210                              | 1.10                                                     | 0.44                    |
| Py-P7        | 3                                                                   | 3.0                          | 100        | 6 d    | >99.9                  | 1480                              | 1.99                                                     | 0.45                    |
| Py-P8        | 3                                                                   | 6.0                          | 0          | 18 h   | <1.0                   | <i>n/d</i> <sup>e</sup>           | <i>n/d</i> <sup>e</sup>                                  | <i>n/d</i> <sup>e</sup> |
| Py-P9        | 3                                                                   | 6.0                          | 25         | 6 d    | 91.6                   | 1190                              | 1.18                                                     | 0.48                    |
| Py-P10       | 3                                                                   | 6.0                          | 80         | 18 h   | 97.98                  | 1430                              | 1.60                                                     | 0.49                    |
| Py-P11       | 3                                                                   | 6.0                          | 100        | 18 h   | 92.3                   | 1370                              | 1.67                                                     | 0.49                    |

<sup>a</sup>[GD]<sub>0</sub> = 2500 mM in toluene. <sup>b</sup>Conversion was determined by <sup>1</sup>H NMR with tetralin as an internal standard. <sup>c</sup>Measured by size-exclusion chromatography calibrated with PEO standards in DMF (50 mM LiBr, 45 °C, flow rate 1.0 mL/min). <sup>d</sup>Degree of branching (DB) was calculated by inverse-gated <sup>13</sup>C NMR with following equation:  $(D + T)/(D + T + L)$  (*D* = dendritic unit; *T* = terminal unit; *L* = linear unit). <sup>e</sup>Not determined.

**Table S3.** Structural control of PGs using BCF catalyst with (*n*-Bu)<sub>3</sub>N as Lewis base at different polymerisation temperatures <sup>a, b</sup>

| Region                              | Chemical shift (ppm) | BCF-P1    | TBA-P3    | TBA-P13   | TBA-P14   | TBA-P15   |
|-------------------------------------|----------------------|-----------|-----------|-----------|-----------|-----------|
| L <sub>1,3</sub>                    | 60.6–61.2            | 2.32      | 1.09      | 0.75      | 1.56      | 1.62      |
| 2T <sub>2</sub>                     | 61.2–61.8            | 0.83      | 0.91      | 1.54      | 0.00      | 1.57      |
| T <sub>1</sub>                      | 63.0–63.3            | 1.41      | 2.62      | 3.89      | 4.82      | 6.13      |
| L <sub>1,3</sub> , L <sub>1,4</sub> | 68.5–69.7            | 2.60      | 4.36      | 6.54      | 7.57      | 8.35      |
| 2D, 2T <sub>1</sub>                 | 70.4–72.0            | 5.47      | 9.54      | 12.91     | 16.15     | 21.01     |
| 2L <sub>1,4</sub>                   | 72.7–73.2            | 3.44      | 1.60      | 11.56     | 11.61     | 13.50     |
| D                                   | 77.7–78.9            | 0.57      | 1.57      | 1.76      | 2.19      | 2.48      |
| L <sub>1,3</sub>                    | 79.7–80.4            | 1.00      | 1.00      | 1.00      | 1.00      | 1.00      |
| T <sub>2</sub>                      | 81.5–82.2            | 0.42      | 0.00      | 0.00      | 0.00      | 0.00      |
| Structure units (%) <sup>c</sup>    |                      |           |           |           |           |           |
| <i>D units</i>                      |                      | <b>9</b>  | <b>26</b> | <b>15</b> | <b>15</b> | <b>15</b> |
| <i>L units</i>                      |                      | <b>63</b> | <b>31</b> | <b>53</b> | <b>51</b> | <b>49</b> |
| ( <i>L</i> <sub>1,3</sub> units)    |                      | (36)      | (18)      | (6)       | (11)      | (9)       |
| ( <i>L</i> <sub>1,4</sub> units)    |                      | (27)      | (13)      | (47)      | (40)      | (40)      |
| <i>T units</i>                      |                      | <b>28</b> | <b>43</b> | <b>32</b> | <b>34</b> | <b>36</b> |
| ( <i>T</i> <sub>1</sub> units)      |                      | (22)      | (43)      | (32)      | (34)      | (36)      |
| ( <i>T</i> <sub>2</sub> units)      |                      | (6)       | (0)       | (0)       | (0)       | (0)       |
| Degree of Branching <sup>d</sup>    |                      |           |           |           |           |           |
|                                     |                      | 0.37      | 0.69      | 0.47      | 0.49      | 0.51      |

<sup>a</sup>[GD]<sub>0</sub> = 2500 mM, [B(C<sub>6</sub>F<sub>5</sub>)<sub>3</sub>]<sub>0</sub> = 3 mM or/and [TBA]<sub>0</sub> = 12 mM in toluene at 25, 80, and 100 °C. <sup>b</sup>Obtained by inverse gated <sup>13</sup>C NMR. <sup>c</sup>The structure units (%) were calculated from the following equation: integration ratio of each structure region / (*D* + *T* + *L*) × 100. <sup>d</sup>Degree of branching (DB) = (*D* + *T*)/(*D* + *T* + *L*).



**Table S4.** Structural control of PGs via BCF with different concentration of  $(n\text{-Bu})_3\text{N}^{a, b}$ 

| Region                              | Chemical shift (ppm) | BCF-P1    | TBA-P3    | TBA-P7    | TBA-P11   | TBA-P15   |
|-------------------------------------|----------------------|-----------|-----------|-----------|-----------|-----------|
| L <sub>1,3</sub>                    | 60.6–61.2            | 2.32      | 1.09      | 1.89      | 1.56      | 1.62      |
| 2T <sub>2</sub>                     | 61.2–61.8            | 0.83      | 0.91      | 1.44      | 1.64      | 1.57      |
| T <sub>1</sub>                      | 63.0–63.3            | 1.41      | 2.62      | 9.49      | 6.88      | 6.13      |
| L <sub>1,3</sub> , L <sub>1,4</sub> | 68.5–69.7            | 2.60      | 4.36      | 11.52     | 10.11     | 8.35      |
| 2D, 2T <sub>1</sub>                 | 70.4–72.0            | 5.47      | 9.54      | 23.34     | 23.30     | 21.01     |
| 2L <sub>1,4</sub>                   | 72.7–73.2            | 3.44      | 1.60      | 20.74     | 16.01     | 13.50     |
| D                                   | 77.7–78.9            | 0.57      | 1.57      | 2.22      | 2.83      | 2.48      |
| L <sub>1,3</sub>                    | 79.7–80.4            | 1.00      | 1.00      | 1.00      | 1.00      | 1.00      |
| T <sub>2</sub>                      | 81.5–82.2            | 0.42      | 0.00      | 0.05      | 0.00      | 0.00      |
| Structure units (%) <sup>c</sup>    |                      |           |           |           |           |           |
| <i>D units</i>                      |                      | <b>9</b>  | <b>26</b> | <b>9</b>  | <b>15</b> | <b>15</b> |
| <i>L units</i>                      |                      | <b>63</b> | <b>31</b> | <b>51</b> | <b>49</b> | <b>49</b> |
| ( <i>L</i> <sub>1,3</sub> units)    |                      | (36)      | (18)      | (8)       | (8)       | (9)       |
| ( <i>L</i> <sub>1,4</sub> units)    |                      | (27)      | (13)      | (43)      | (41)      | (40)      |
| <i>T units</i>                      |                      | <b>28</b> | <b>43</b> | <b>40</b> | <b>36</b> | <b>36</b> |
| ( <i>T</i> <sub>1</sub> units)      |                      | (22)      | (43)      | (40)      | (36)      | (36)      |
| ( <i>T</i> <sub>2</sub> units)      |                      | (6)       | (0)       | (0)       | (0)       | (0)       |
| Degree of Branching <sup>d</sup>    |                      |           |           |           |           |           |
|                                     |                      | 0.37      | 0.69      | 0.49      | 0.50      | 0.51      |

<sup>a</sup>[GD]<sub>0</sub> = 2500 mM, [B(C<sub>6</sub>F<sub>5</sub>)<sub>3</sub>]<sub>0</sub> = 3 mM or/and [TBA]<sub>0</sub> = 3, 6, and 12 mM in toluene at 100 °C. <sup>b</sup>Obtained by inverse-gated <sup>13</sup>C NMR. <sup>c</sup>The structure units (%) were calculated from the following equation: integration ratio of each structure region / (*D* + *T* + *L*) × 100. <sup>d</sup>Degree of branching (DB) = (*D* + *T*) / (*D* + *T* + *L*).

**Table S5.** Structural control of PGs using BCF catalyst with pyridine as Lewis base at different polymerisation temperatures <sup>a, b</sup>

| Region                              | Chemical shift (ppm) | BCF-P1    | Py-P3     | Py-P9     | Py-P10    | Py-P11    |
|-------------------------------------|----------------------|-----------|-----------|-----------|-----------|-----------|
| L <sub>1,3</sub>                    | 60.6–61.2            | 2.32      | 0.70      | 0.88      | 1.37      | 1.17      |
| 2T <sub>2</sub>                     | 61.2–61.8            | 0.83      | 0.58      | 0.00      | 0.86      | 2.82      |
| T <sub>1</sub>                      | 63.0–63.3            | 1.41      | 1.52      | 6.18      | 6.27      | 23.78     |
| L <sub>1,3</sub> , L <sub>1,4</sub> | 68.5–69.7            | 2.60      | 2.37      | 9.56      | 8.47      | 20.30     |
| 2D, 2T <sub>1</sub>                 | 70.4–72.0            | 5.47      | 5.01      | 17.25     | 18.69     | 64.02     |
| 2L <sub>1,4</sub>                   | 72.7–73.2            | 3.44      | 3.27      | 19.02     | 15.55     | 55.84     |
| D                                   | 77.7–78.9            | 0.57      | 0.85      | 1.90      | 1.47      | 3.57      |
| L <sub>1,3</sub>                    | 79.7–80.4            | 1.00      | 1.00      | 1.00      | 1.00      | 1.00      |
| T <sub>2</sub>                      | 81.5–82.2            | 0.42      | 0.00      | 0.00      | 0.00      | 0.00      |
| Structure units (%) <sup>c</sup>    |                      |           |           |           |           |           |
| <i>D units</i>                      |                      | <b>9</b>  | <b>18</b> | <b>10</b> | <b>9</b>  | <b>6</b>  |
| <i>L units</i>                      |                      | <b>63</b> | <b>50</b> | <b>56</b> | <b>54</b> | <b>52</b> |
| ( <i>L<sub>1,3</sub> units</i> )    |                      | (36)      | (15)      | (5)       | (8)       | (2)       |
| ( <i>L<sub>1,4</sub> units</i> )    |                      | (27)      | (35)      | (51)      | (46)      | (50)      |
| <i>T units</i>                      |                      | <b>28</b> | <b>32</b> | <b>34</b> | <b>37</b> | <b>42</b> |
| ( <i>T<sub>1</sub> units</i> )      |                      | (22)      | (32)      | (34)      | (37)      | (42)      |
| ( <i>T<sub>2</sub> units</i> )      |                      | (6)       | (0)       | (0)       | (0)       | (0)       |
| Degree of Branching <sup>d</sup>    |                      |           |           |           |           |           |
|                                     |                      | 0.37      | 0.50      | 0.44      | 0.46      | 0.48      |

<sup>a</sup>[GD]<sub>0</sub> = 2500 mM, [B(C<sub>6</sub>F<sub>5</sub>)<sub>3</sub>]<sub>0</sub> = 3 mM or/and [pyridine]<sub>0</sub> = 6 mM in toluene at 25, 80, and 100 °C. <sup>b</sup>Obtained by inverse-gated <sup>13</sup>C NMR. <sup>c</sup>The structure units (%) were calculated from the following equation: integration ratio of each structure region / (*D* + *T* + *L*) × 100. <sup>d</sup>Degree of branching (DB) = (*D* + *T*)/(*D* + *T* + *L*).

**Table S6.** Structural control of PGDs using BCF with different concentration of pyridine <sup>a, b</sup>

| Region                              | Chemical shift (ppm) | BCF-P1    | Py-P3     | Py-P7     | Py-P11    |
|-------------------------------------|----------------------|-----------|-----------|-----------|-----------|
| L <sub>1,3</sub>                    | 60.6–61.2            | 2.32      | 0.70      | 2.15      | 1.17      |
| 2T <sub>2</sub>                     | 61.2–61.8            | 0.83      | 0.58      | 0.89      | 2.82      |
| T <sub>1</sub>                      | 63.0–63.3            | 1.41      | 1.52      | 4.08      | 23.78     |
| L <sub>1,3</sub> , L <sub>1,4</sub> | 68.5–69.7            | 2.60      | 2.37      | 4.05      | 20.30     |
| 2D, 2T <sub>1</sub>                 | 70.4–72.0            | 5.47      | 5.01      | 9.03      | 64.02     |
| 2L <sub>1,4</sub>                   | 72.7–73.2            | 3.44      | 3.27      | 7.94      | 55.84     |
| D                                   | 77.7–78.9            | 0.57      | 0.85      | 0.40      | 3.57      |
| L <sub>1,3</sub>                    | 79.7–80.4            | 1.00      | 1.00      | 1.00      | 1.00      |
| T <sub>2</sub>                      | 81.5–82.2            | 0.42      | 0.00      | 0.60      | 0.00      |
| Structure units (%) <sup>c</sup>    |                      |           |           |           |           |
| <i>D units</i>                      |                      | <b>9</b>  | <b>18</b> | <b>4</b>  | <b>6</b>  |
| <i>L units</i>                      |                      | <b>63</b> | <b>50</b> | <b>54</b> | <b>52</b> |
| ( <i>L<sub>1,3</sub> units</i> )    |                      | (36)      | (15)      | (19)      | (2)       |
| ( <i>L<sub>1,4</sub> Units</i> )    |                      | (27)      | (35)      | (35)      | (50)      |
| <i>T units</i>                      |                      | <b>28</b> | <b>32</b> | <b>42</b> | <b>42</b> |
| ( <i>T<sub>1</sub> units</i> )      |                      | (22)      | (32)      | (37)      | (42)      |
| ( <i>T<sub>2</sub> units</i> )      |                      | (6)       | (0)       | (5)       | (0)       |
| Degree of Branching <sup>d</sup>    |                      | 0.37      | 0.50      | 0.45      | 0.48      |

<sup>a</sup>[GD]<sub>0</sub> = 2500 mM, [B(C<sub>6</sub>F<sub>5</sub>)<sub>3</sub>]<sub>0</sub> = 3 mM or/and [pyridine]<sub>0</sub> = 3 and 6 mM in toluene at 100 °C. <sup>b</sup>Obtained by inverse-gated <sup>13</sup>C NMR. <sup>c</sup>The structure units (%) were calculated from the following equation: integration ratio of each structure region / (*D* + *T* + *L*) × 100. <sup>d</sup>Degree of branching (DB) = (*D* + *T*) / (*D* + *T* + *L*).
